# Supplementary material
Source: PubMed Central journal article supplement (PMC2781997)
Supplement: supp_M109.017061_jbc.M109.017061-1.pdf [file supp_M109.017061_jbc.M109.017061-1.pdf]

Supplemental Figure 1

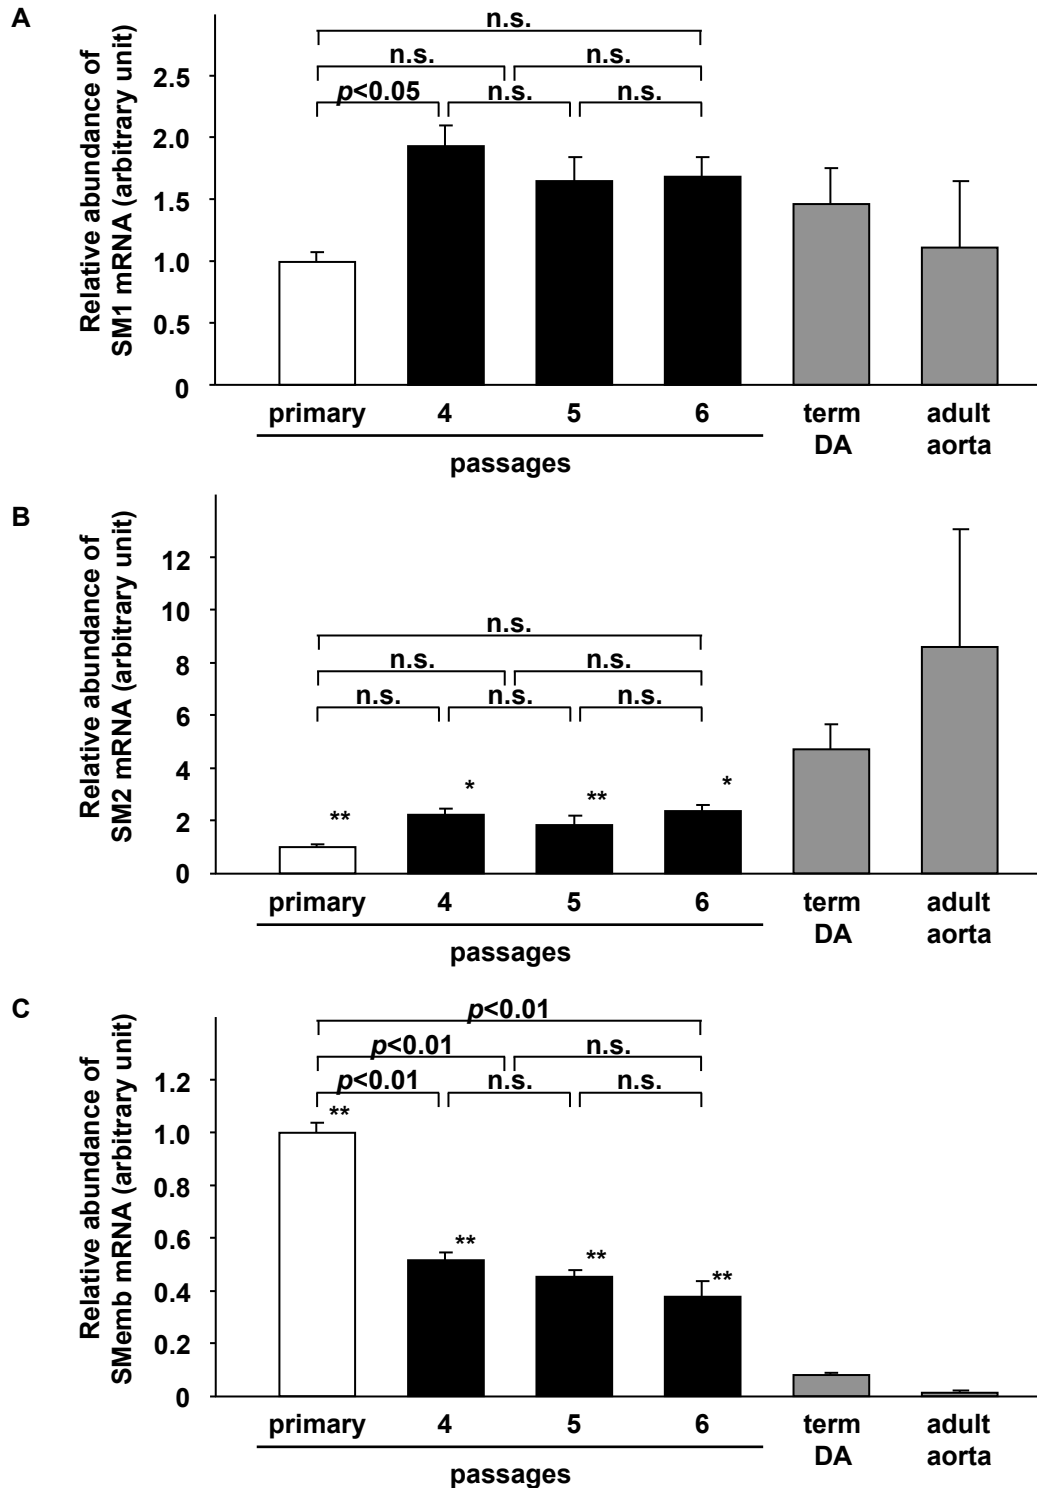

**Supplemental Figure 1. Expression levels of SM1, SM2, and SMemb mRNA using DA SMCs of primary, 4, 5, and 6 passages by quantitative RT-PCR**

(A) Relative abundance of SM1 mRNA measured. (B) Relative abundance of SM2 mRNA measured. (C) Relative abundance of SMemb mRNA measured. The 5' and 3' primer specific for SM1 was 5'- aaactcaggagaggaacgag -3' and 3'- tcaactggcttgggtccatt -5'. The 5' and 3' primer specific for SM2 was 5'- ctggatgaggccactgagag -3' and 3'- ggctcactgcgaagtttctt -5'. The 5' and 3' primer specific for SMemb was 5'- gaagcagaaatcctccagttg -3' and 3'- gcttctcatccagcagagc -5'. (A)~(C) The values are expressed as means±SEM. n=4. \* and \*\* indicates  $p<0.05$  and  $p<0.01$  versus term DA or adult aorta tissue. n.s.: not significant. term DA and adult aorta tissue were obtained from Wistar rat at embryonic day 21<sup>st</sup> and 14 weeks, used as dedifferentiated marker.
