# Supplementary material
Source: PubMed Central journal article supplement (PMC2781997)
Supplement: supp_M109.017061_jbc.M109.017061-2.pdf [file supp_M109.017061_jbc.M109.017061-2.pdf]

Supplemental Figure 2

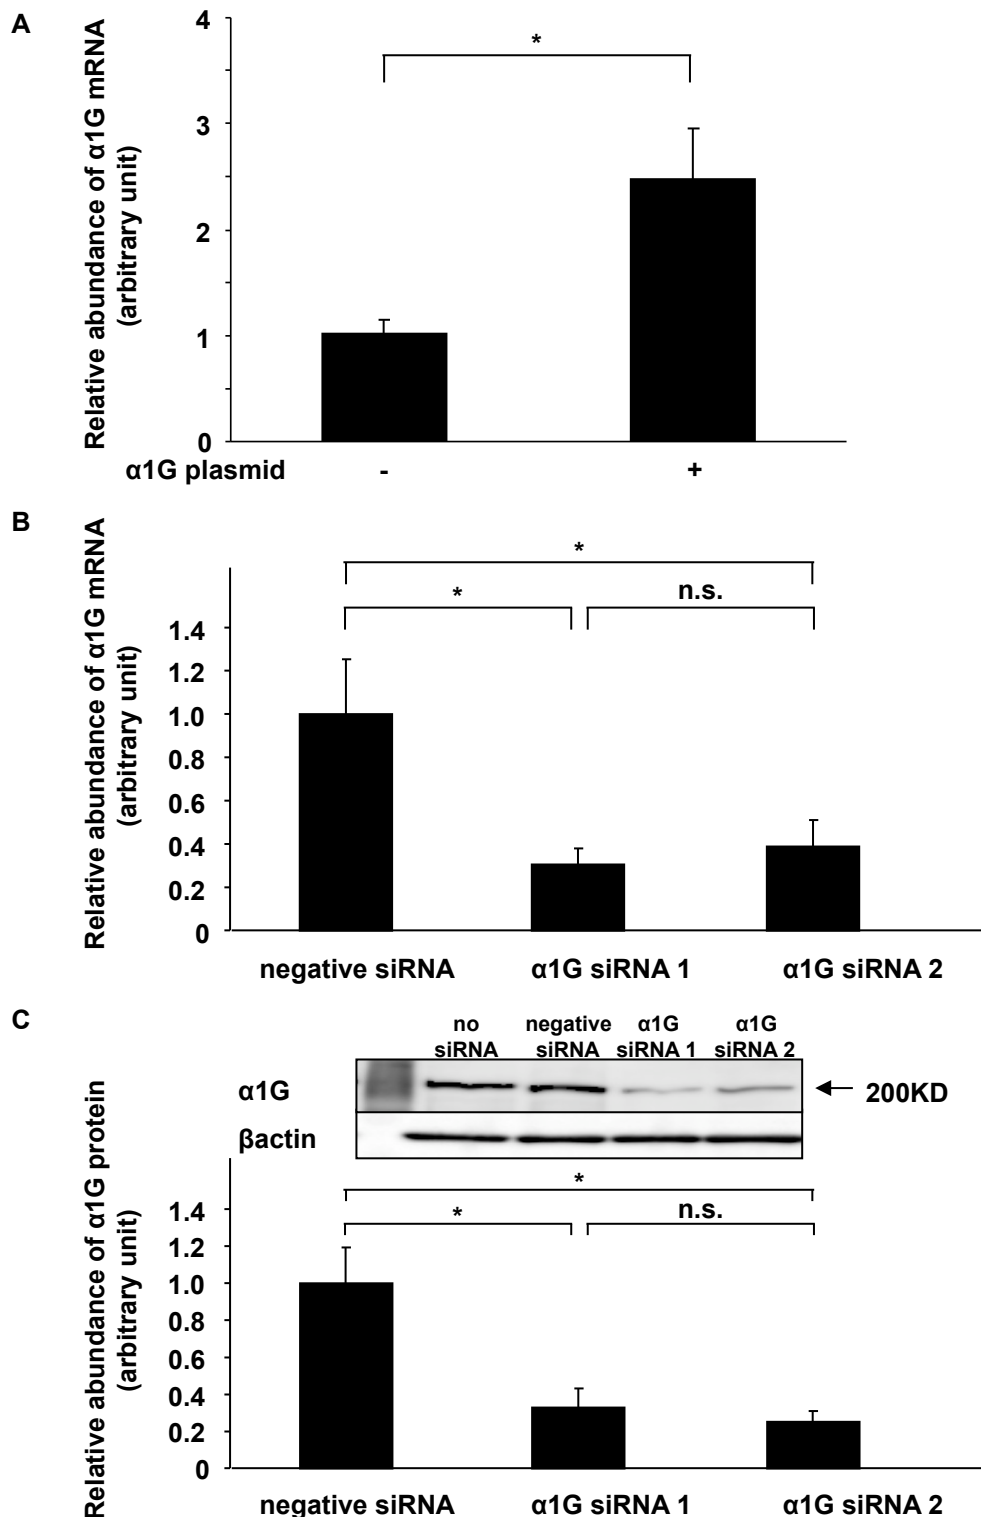

**Supplemental Figure 2. Expression levels of  $\alpha 1G$  mRNA and protein**

(A) Relative abundance of  $\alpha 1G$  mRNA measured by quantitative RT-PCR when  $\alpha 1G$  was overexpressed.  $n=6$ . \* indicates  $p<0.05$ . (B) Relative abundance of  $\alpha 1G$  mRNA measured by quantitative RT-PCR when two  $\alpha 1G$ -specific siRNAs were transfected.  $n=5$ . \* indicates  $p<0.05$ . n.s.: not significant. (C) The expression levels of  $\alpha 1G$  protein by Western blot when  $\alpha 1G$ -specific siRNA was transfected.  $n=4$ . \* indicates  $p<0.05$ . n.s.: not significant. (A)~(C) The values are expressed as means $\pm$ SEM.
