# Supplementary material
Source: PubMed Central journal article supplement (PMC2781997)
Supplement: supp_M109.017061_jbc.M109.017061-3.pdf [file supp_M109.017061_jbc.M109.017061-3.pdf]

### Supplemental Figure 3

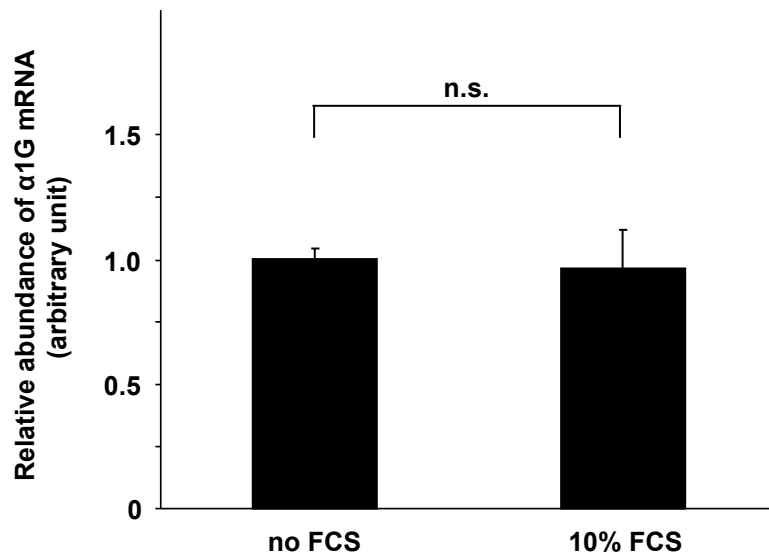

#### **Supplemental Figure 3. Expression levels of $\alpha$ 1G mRNA by stimulating FCS**

Relative abundance of  $\alpha$ 1G mRNA measured by quantitative RT-PCR. The expression of  $\alpha$ 1G mRNA did not change between the no FCS and 10% FCS at the condition of the culture medium. The values are expressed as means $\pm$ SEM. n=3. n.s.: not significant.
