# Supplementary material
Source: PubMed Central journal article supplement (PMC2781997)
Supplement: supp_M109.017061_jbc.M109.017061-4.pdf [file supp_M109.017061_jbc.M109.017061-4.pdf]

Supplemental Figure 4

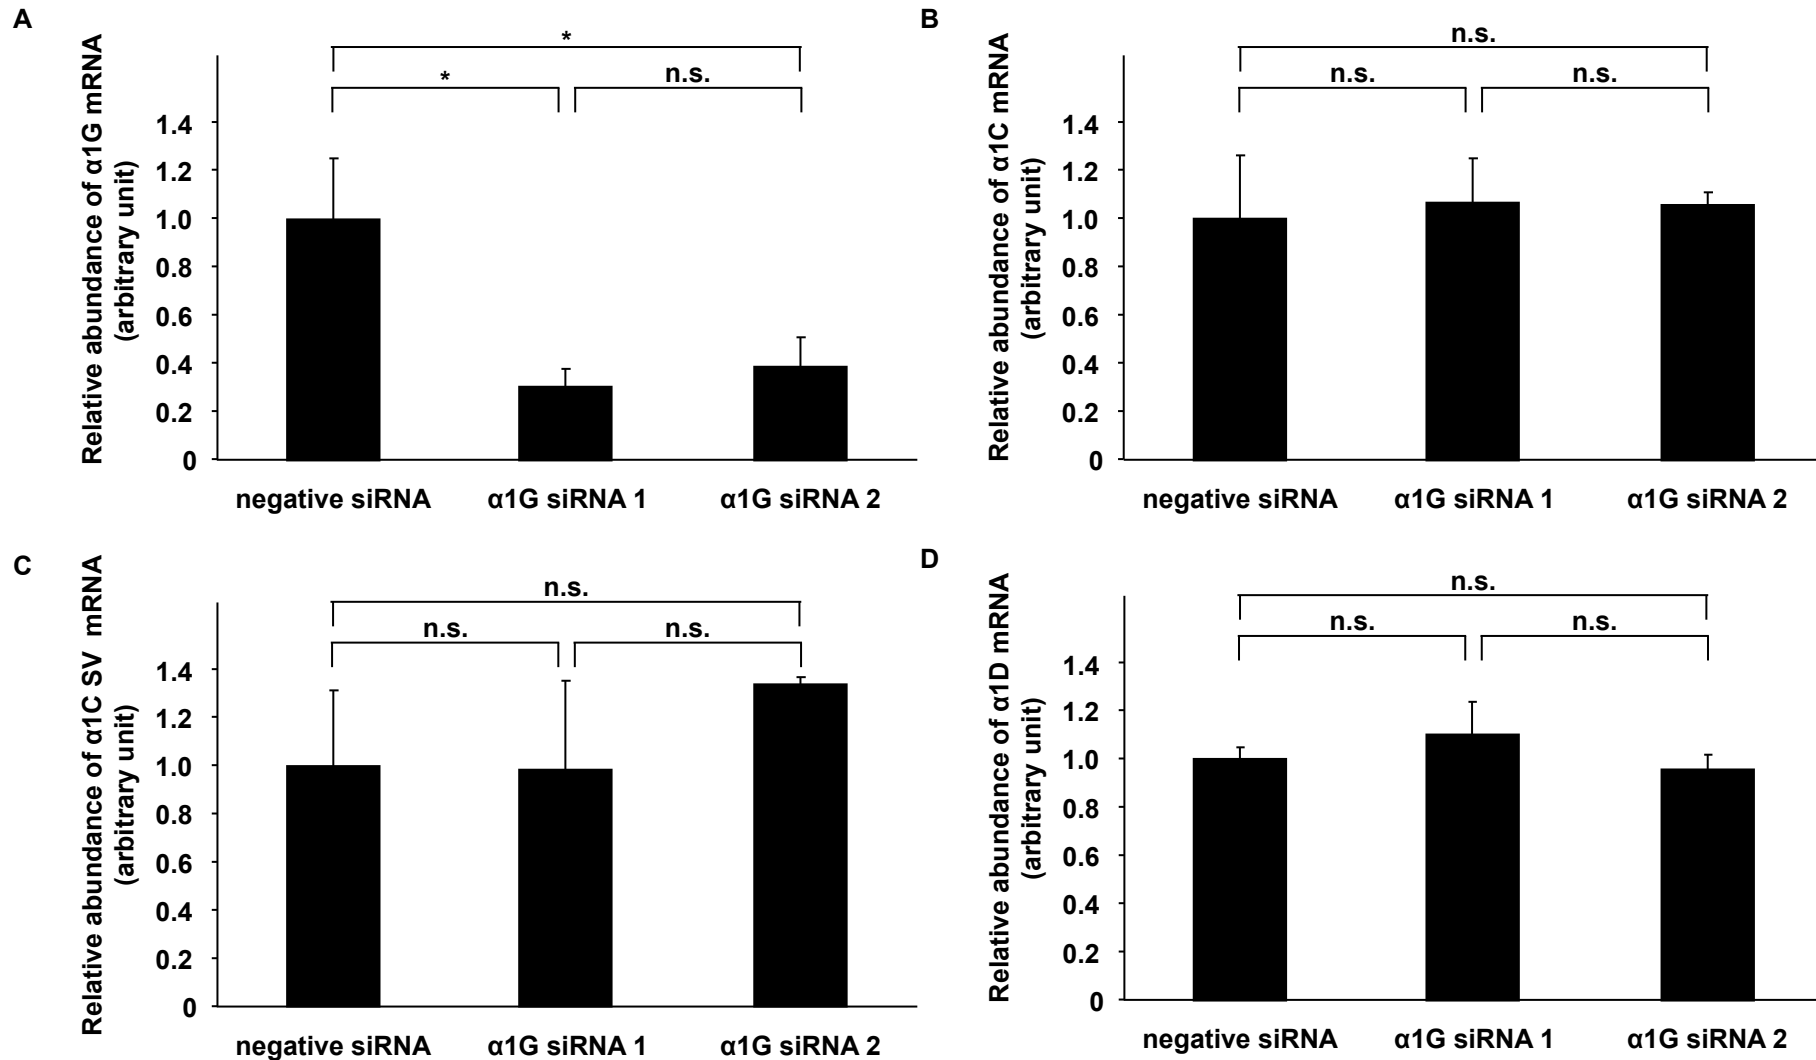

**Supplemental Figure 4. Expression levels of VDCCs mRNA when two  $\alpha 1G$ -specific siRNAs were transfected by quantitative RT-PCR**

(A) Relative abundance of  $\alpha 1G$  mRNA measured. The expression of  $\alpha 1G$  mRNA was significantly inhibited. (B) Relative abundance of  $\alpha 1C$  mRNA. The expression of  $\alpha 1C$  mRNA did not change. (C) Relative abundance of  $\alpha 1C$  splice variant mRNA measured. The expression of  $\alpha 1C$  splice variant mRNA did not change. (D) Relative abundance of  $\alpha 1D$  mRNA measured. The expression of  $\alpha 1D$  mRNA did not change. The 5' probe (FAM) specific for  $\alpha 1C$  was 5'- tagcaatcaccgaggtacaccagctg -3'. The 5' probe (VIC) specific for  $\alpha 1C$  splice variant (SV) was 5'- tgaagacaaacccccgaacatgagca -3'. The 5' and 3' primer specific for  $\alpha 1D$  was 5'- gaagaggacgagcctgaggtt -3' and 3'- tttctcctcatgttcaactctga -5'. (A)~(D) The values are expressed as means $\pm$ SEM. n=5. \* indicates  $p < 0.05$ . n.s.: not significant.
