# Supplementary material
Source: PubMed Central journal article supplement (PMC2781997)
Supplement: supp_M109.017061_jbc.M109.017061-5.pdf [file supp_M109.017061_jbc.M109.017061-5.pdf]

## Supplemental Figure 5

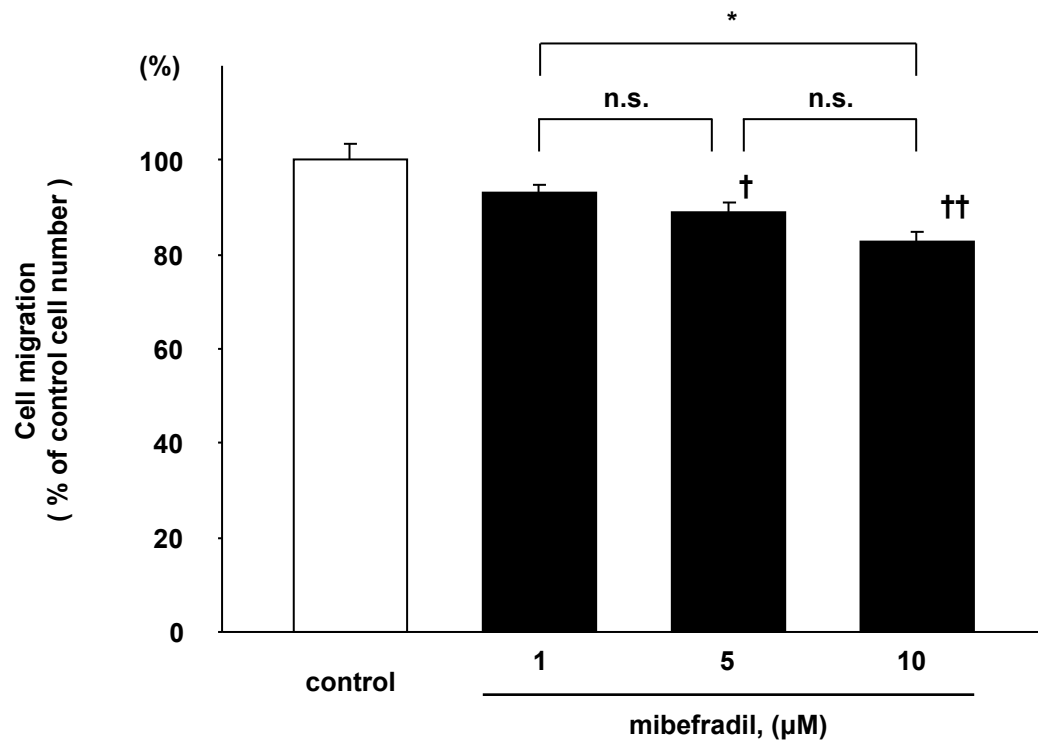

### Supplemental Figure 5. *Effects of Mibefradil, a selective T-type calcium channel blocker, on DA SMC migration*

Mibefradil, was purchased from Sigma-Aldrich, significantly attenuated DA SMC migration by 83% in a dose-dependent manner. The values are expressed as means $\pm$ SEM. n=8. \* indicates  $p<0.05$ . † and †† indicates  $p<0.05$  and  $p<0.01$  versus control. n.s.: not significant.
