# Supplementary material
Source: PubMed Central journal article supplement (PMC2781997)
Supplement: supp_M109.017061_jbc.M109.017061-6.pdf [file supp_M109.017061_jbc.M109.017061-6.pdf]

Supplemental Figure 6

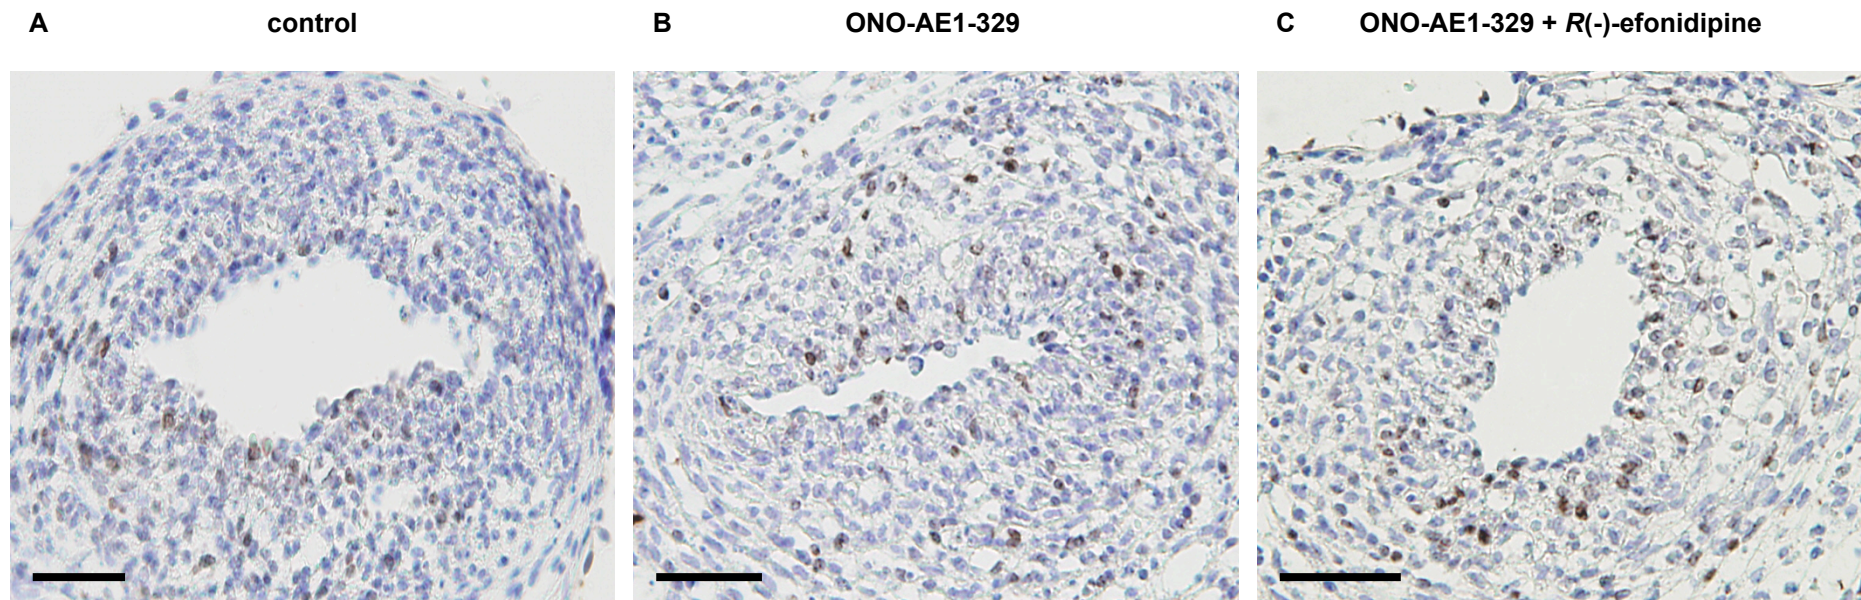

**Supplemental Figure 6. *Ki-67* staining when *R(-)*-efonidipine inhibited *EP4*-mediated intimal thickening of immature rat DA explants**  
(A) control. (B) ONO-AE1-329 ( $10^{-6}$ M). (C) ONO-AE1-329 ( $10^{-6}$ M) plus *R(-)*-efonidipine ( $10^{-6}$ M). Scale bars, 50  $\mu$ m.
