# Supplementary material
Source: PubMed Central journal article supplement (PMC2781997)
Supplement: supp_M109.017061_jbc.M109.017061-7.pdf [file supp_M109.017061_jbc.M109.017061-7.pdf]

Supplemental Figure 7

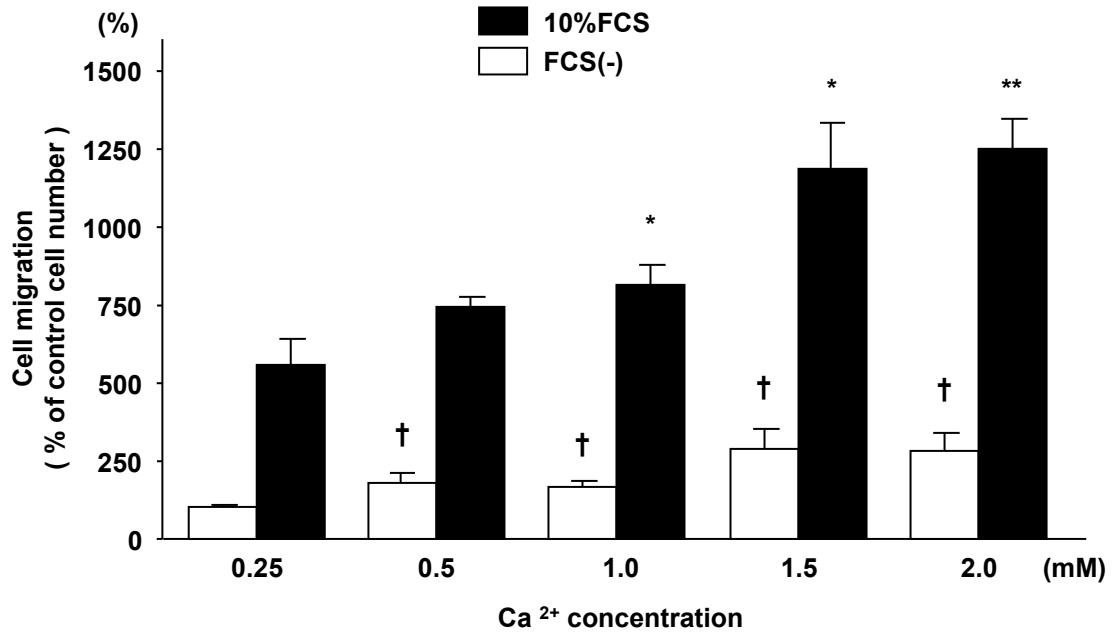

**Supplemental Figure 7. Effect of extracellular Ca<sup>2+</sup> on DA SMC migration**

DA SMC migration was increased in accordance with the concentration of an extracellular Ca<sup>2+</sup>. The values are expressed as means±SEM. n=6, † indicates  $p < 0.05$  versus Ca<sup>2+</sup> concentration 0.25mM not containing FCS. \* and \*\* indicate  $p < 0.05$  and  $p < 0.01$  versus Ca<sup>2+</sup> concentration 0.25mM containing 10%FCS, respectively. FCS: fetal calf serum.
